# Supplementary material for: Nrf2 Activation Attenuates Acrylamide-Induced Neuropathy in Mice
Source: MDPI journal article supplement (doi:10.3390/ijms22115995), 2021-06-01
Supplement: s1 [file s1]

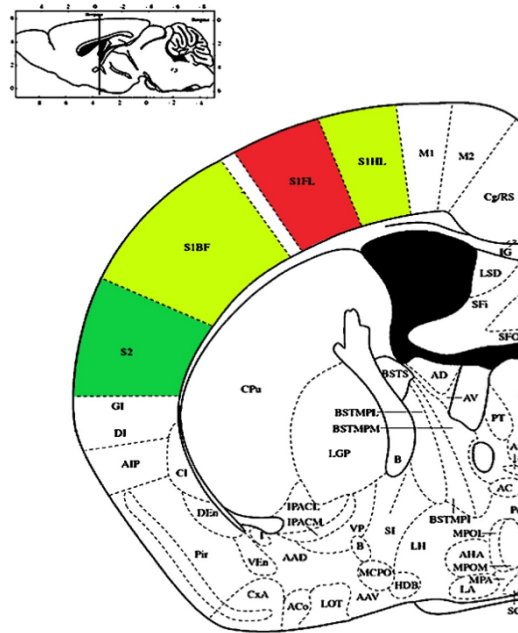

**Figure S1.** The mouse brain in stereotaxic coordinates showing the regions of the somatosensory cortex [124]. Immunohistochemistry for noradrenergic axons (noradrenaline transporter; NAT) was performed and quantified within the primary (S1BF, S1HL, S1FL) and secondary (S2) somatosensory cortex.

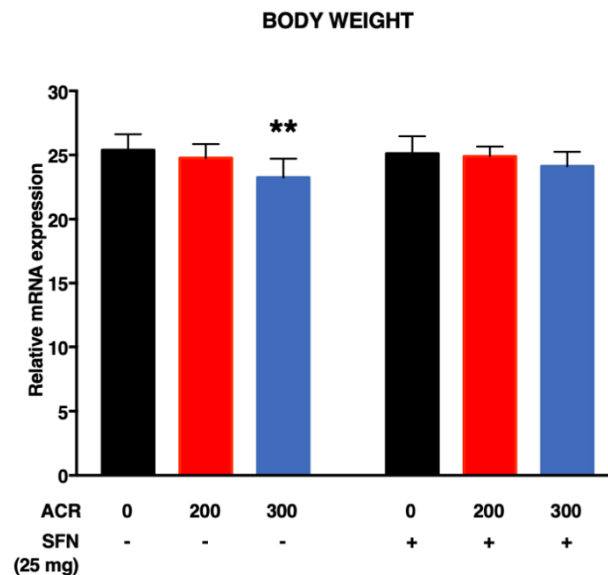

**Figure S2.** Effects of 4-week acrylamide and sulforaphane administration on body weight. Data are mean  $\pm$  SD. \* $P < 0.05$ , \*\* $P < 0.001$  compared to the corresponding treatment control (by ANOVA followed by Dunnett's multiple comparison). [n=10].

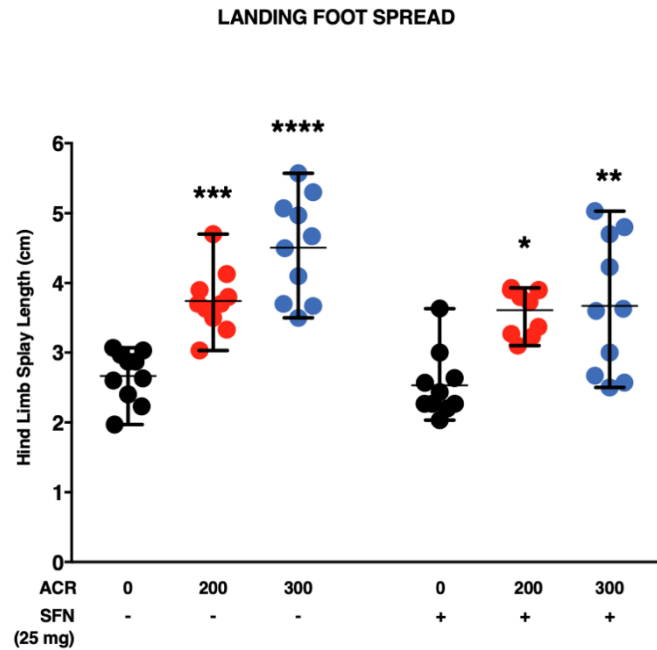

**Figure S3.** Effects of acrylamide on landing foot spread in mice. Acrylamide increased hindlimb splay in mice and sulforaphane abrogated this effect. Data are mean  $\pm$  SD. \* $P < 0.05$ , \*\* $p < 0.01$ , \*\*\* $p < 0.001$ , \*\*\*\* $p < 0.0001$ , compared to the corresponding treatment control (by ANOVA followed by Dunnett's multiple comparison). (n=10).

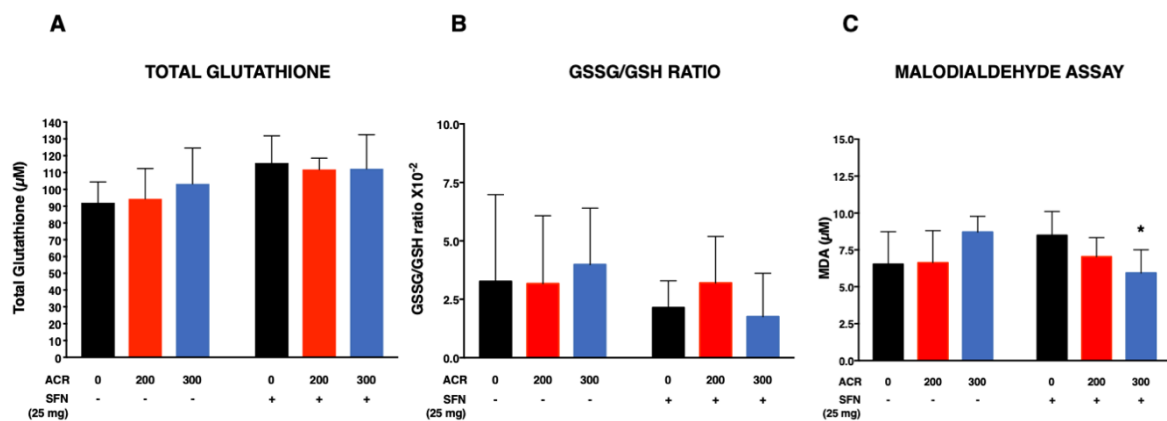

**Figure 4.** Effects of 4-week exposure to acrylamide and sulforaphane treatment on induction of markers of oxidative stress in the cerebral cortex; total glutathione, glutathione redox ratio (GSSG/GSH) and malondialdehyde (MDA). Data are mean  $\pm$  SD. \* $P < 0.05$ , compared to the corresponding treatment control (by ANOVA followed by Dunnett's multiple comparison). [n=6]

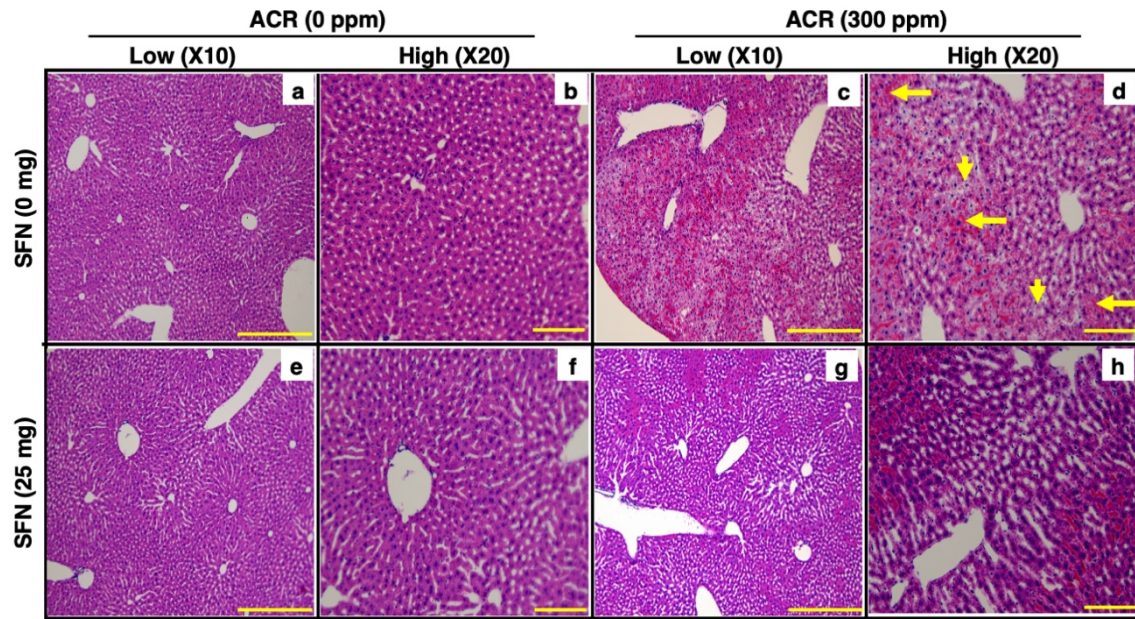

**Figure S5.** Representative photomicrographs of H&E-stained histological sections of the liver following exposure to acrylamide and sulforaphane for 4 weeks. Acrylamide induced extensive necrosis (arrowheads) and severe hemorrhage (arrows). Photomicrographs of the liver of acrylamide-exposed mice (a-d), and acrylamide plus sulforaphane-treated mice (e-h). Note the limited hemorrhage and clearance of necrotic lesions in sulforaphane-treated mice. Scale bars= 250  $\mu$ m (a, c, e and g) and 40  $\mu$ m (b, d, f and h).

**Table S1.** Effects of different doses of acrylamide and sulforaphane treatment on the density of noradrenergic axons in primary somatosensory cortex (S1HL, S1BF and S1FL) and secondary somatosensory cortex (S2)

| Region | Treatment      | Concentration of acrylamide (ppm) |           |           |
|--------|----------------|-----------------------------------|-----------|-----------|
|        |                | 0                                 | 200       | 300       |
| S1HL   | <i>SFN (-)</i> | 29.3±2.4                          | 23.6±5.4  | 20.7±5.4* |
|        | <i>SFN (+)</i> | 27.3±1.4                          | 25.5±1.6  | 25.0±1.1  |
| S1BF   | <i>SFN (-)</i> | 29.3±5.6                          | 19.2±1.6* | 18.7±1.8* |
|        | <i>SFN (+)</i> | 26.4±1.0                          | 22.3±1.9* | 24.9±27.0 |
| S1FL   | <i>SFN (-)</i> | 29.2±2.6                          | 23.2±3.9  | 22.6±2.9* |
|        | <i>SFN (+)</i> | 27.7±1.1                          | 24.4±3.0  | 24.1±1.0* |
| S2     | <i>SFN (-)</i> | 28.5±2.4                          | 19.8±1.8* | 18.1±2.6* |
|        | <i>SFN (+)</i> | 26.2±2.4                          | 26.1±3.9  | 23.9±0.5  |

Data are mean ±SD.

\*p<0.05, compared with the corresponding treatment control by Dunnett's multiple comparison following ANOVA for the density of noradrenergic axons in S1HL, S1BF, S1FL and S2 (n=4).

Primary somatosensory cortices (S1BF: barrel field; S1FL: forelimb; S1HL: hindlimb), secondary somatosensory cortex (S2).

Table S2. Effects of different doses of acrylamide and sulforaphane treatment on the relative mRNA expression levels of Nrf2-downstream antioxidant genes in the cerebral cortex

| Test Parameter | Treatment      | Concentration of acrylamide (ppm) |          |          |
|----------------|----------------|-----------------------------------|----------|----------|
|                |                | 0                                 | 200      | 300      |
| SOD-1          | <i>SFN</i> (-) | 1.0±0.1                           | 1.1±0.1  | 1.2±0.1* |
|                | <i>SFN</i> (+) | 1.2±0.1                           | 1.3±0.1  | 1.6±0.3* |
| NQO1           | <i>SFN</i> (-) | 1.0±0.1                           | 1.2±0.1  | 1.7±0.9  |
|                | <i>SFN</i> (+) | 1.3±0.4                           | 1.5±0.3  | 2.1±0.6* |
| HO-1           | <i>SFN</i> (-) | 1.0±0.2                           | 1.4±0.3  | 1.7±0.5* |
|                | <i>SFN</i> (+) | 1.0±0.2                           | 1.1±0.4  | 1.1±0.3  |
| GST-M5         | <i>SFN</i> (-) | 1.0±0.1                           | 1.1±0.2  | 1.2±0.2  |
|                | <i>SFN</i> (+) | 1.2±0.1                           | 1.2±0.1  | 1.5±0.2* |
| GST-M          | <i>SFN</i> (-) | 1.0±0.1                           | 1.3±0.2  | 1.4±0.3* |
|                | <i>SFN</i> (+) | 1.2±0.1                           | 1.4±0.1  | 1.7±0.4* |
| NRF2           | <i>SFN</i> (-) | 1.0±0.1                           | 1.1±0.1  | 1.2±0.1* |
|                | <i>SFN</i> (+) | 1.0±0.1                           | 1.1±0.1  | 1.3±0.2* |
| TXNRD1         | <i>SFN</i> (-) | 1.0±0.4                           | 0.9±0.2  | 1.0±0.2  |
|                | <i>SFN</i> (+) | 0.6±0.1                           | 1.0±0.3* | 1.2±0.2* |
| MT-1           | <i>SFN</i> (-) | 1.0±0.2                           | 1.5±0.3  | 1.9±0.6* |
|                | <i>SFN</i> (+) | 0.8±0.2                           | 1.6±0.6* | 2.5±0.3* |

Data are mean ±SD.

\*p<0.05, compared to the corresponding genotype control by Dunnett's multiple comparison following ANOVA (n=6).

**Table S3.** Effects of different doses of acrylamide and sulforaphane treatment on the relative mRNA expression levels of pro-inflammatory cytokines in the cerebral cortex

| Test Parameter | Treatment      | Concentration of acrylamide (ppm) |               |                |
|----------------|----------------|-----------------------------------|---------------|----------------|
|                |                | 0                                 | 200           | 300            |
| TNF- $\alpha$  | <i>SFN</i> (-) | 1.0 $\pm$ 0.3                     | 1.2 $\pm$ 0.2 | 1.8 $\pm$ 0.7* |
|                | <i>SFN</i> (+) | 1.1 $\pm$ 0.3                     | 1.4 $\pm$ 0.3 | 1.3 $\pm$ 0.3  |
| iNOS           | <i>SFN</i> (-) | 1.0 $\pm$ 0.5                     | 1.3 $\pm$ 0.3 | 1.7 $\pm$ 0.3* |
|                | <i>SFN</i> (+) | 0.9 $\pm$ 0.3                     | 1.2 $\pm$ 0.2 | 1.2 $\pm$ 0.3  |
| IL-1 $\beta$   | <i>SFN</i> (-) | 1.0 $\pm$ 0.1                     | 1.1 $\pm$ 0.1 | 1.1 $\pm$ 0.2  |
|                | <i>SFN</i> (+) | 0.9 $\pm$ 0.2                     | 1.0 $\pm$ 0.3 | 0.9 $\pm$ 0.2  |
| IL-6           | <i>SFN</i> (-) | 1.0 $\pm$ 0.2                     | 1.2 $\pm$ 0.3 | 1.1 $\pm$ 0.2  |
|                | <i>SFN</i> (+) | 0.8 $\pm$ 0.1                     | 1.0 $\pm$ 0.2 | 0.9 $\pm$ 0.1  |
| COX-2          | <i>SFN</i> (-) | 1.0 $\pm$ 0.3                     | 1.1 $\pm$ 0.3 | 1.0 $\pm$ 0.3  |
|                | <i>SFN</i> (+) | 1.2 $\pm$ 0.2                     | 1.1 $\pm$ 0.3 | 1.1 $\pm$ 0.3  |

Data are mean  $\pm$ SD.

\*p<0.05, compared to the corresponding genotype control by Dunnett's multiple comparison following ANOVA (n=8).
